# Supplementary material for: Determining the structure of zeolite frameworks at high pressures
Source: Royal Society of Chemistry journal article supplement (doi:10.1039/d1ce00142f), 2021-01-01
Supplement: d1ce00142f1.pdf [file d1ce00142f1.pdf]

## Electronic Supplementary Information

### Crystal structures at ambient pressure

Table 1: Refined atomic positions, occupancy factors (F), and displacement parameters (Uiso) for dehydrated K-L determined from ToF neutron diffraction data collected on the POLARIS instrument at ambient pressure

| Atom Type | Label | x           | y           | z           | F     | Uiso      | Wyckoff Site Symmetry |
|-----------|-------|-------------|-------------|-------------|-------|-----------|-----------------------|
| K         | K_1   | 0.3333      | 0.6667      | 0.5         | 1     | 0.026(2)  | 2d $-6m2(100)$        |
| K         | K_2   | 0           | 0.5         | 0.5         | 1     | 0.026(2)  | 3g $mmm(010)$         |
| K         | K_3   | 0           | 0.3178(8)   | 0           | 0.57  | 0.026(2)  | 6j $mm2(010)$         |
| O         | O_1   | 0           | 0.27365(24) | 0.5         | 1     | 0.0107(2) | 6k $mm2(010)$         |
| O         | O_2   | 0.1640(5)   | 0.3277      | 0.5         | 1     | 0.0107(2) | 6m $mm2(101)$         |
| O         | O_3   | 0.2651(3)   | 0.5275      | 0.2537(4)   | 1     | 0.01334   | 12o $m(100)$          |
| O         | O_4   | 0.10173(12) | 0.41455(14) | 0.32241(22) | 1     | 0.0107(2) | 24r 1                 |
| O         | O_5   | 0.4267(4)   | 0.8526      | 0.2738(3)   | 1     | 0.0107(2) | 12p $m(100)$          |
| O         | O_6   | 0.14501(17) | 0.47680(16) | 0           | 1     | 0.0107(2) | 12p $m(001)$          |
| Si        | Si_1  | 0.09310(24) | 0.35739(27) | 0.5         | 0.767 | 0.009(1)  | 12q $m(001)$          |
| Al        | Al_1  | 0.09310(24) | 0.35739(27) | 0.5         | 0.233 | 0.009(1)  | 12q $m(001)$          |
| Si        | Si_2  | 0.16507(22) | 0.49751(20) | 0.21207(30) | 0.767 | 0.0081(6) | 24r 1                 |
| Al        | Al_2  | 0.16507(22) | 0.49751(20) | 0.21207(30) | 0.233 | 0.0081(6) | 24r 1                 |

Table 2: Rietveld refinement parameters for dehydrated K-L determined from ToF neutron diffraction data collected on the POLARIS instrument at ambient pressure

|                                             |            |
|---------------------------------------------|------------|
| data range ( $d$ -spacing) ( $\text{\AA}$ ) | 0.6-13     |
| no. of observations                         | 9518       |
| no. of variables                            | 67         |
| $a$ ( $\text{\AA}$ )                        | 18.4199(6) |
| $c$ ( $\text{\AA}$ )                        | 7.4937(2)  |
| volume ( $\text{\AA}^3$ )                   | 2201.92(9) |
| $R_{exp}$                                   | 1.21       |
| $R_{wp}$                                    | 2.00       |
| reduced $\chi^2 = (R_{wp}/R_{exp})^2$       | 2.72       |
| GOF = $(R_{wp}/R_{exp})^2$                  | 1.65       |

Table 3: Refined atomic positions, occupancy factors (F), and displacement parameters (Uiso) for dehydrated K-L with m.e., determined from ToF neutron diffraction data collected on the PEARL instrument at ambient pressure

| Atom Type | Label | x          | y          | z          | F         | Uiso       | Wyckoff Site Symmetry |
|-----------|-------|------------|------------|------------|-----------|------------|-----------------------|
| K_1       | K     | 0.3333     | 0.6667     | 0.5        | 1         | 0.030(5)   | 2d $-6m2(100)$        |
| K_2       | K     | 0          | 0.5        | 0.5        | 1         | 0.03       | 3g $mmm(010)$         |
| K_3       | K     | 0          | 0.2994(21) | 0          | 0.57      | 0.03       | 6j $mm2(010)$         |
| O_1       | O     | 0          | 0.2698(8)  | 0.5        | 1         | 0.0203(9)  | 6k $mm2(010)$         |
| O_2       | O     | 0.1647(13) | 0.3295     | 0.5        | 1         | 0.0203     | 6m $mm2(101)$         |
| O_3       | O     | 0.2637(11) | 0.5274     | 0.2494(13) | 1         | 0.0203     | 12o $m(100)$          |
| O_4       | O     | 0.1039(4)  | 0.4137(5)  | 0.3197(7)  | 1         | 0.0203     | 24r 1                 |
| O_5       | O     | 0.4265(14) | 0.853      | 0.2753(11) | 1         | 0.0203     | 12p $m(100)$          |
| O_6       | O     | 0.1413(6)  | 0.4770(6)  | 0          | 1         | 0.0203     | 12p $m(001)$          |
| Si_1      | Si    | 0.0921     | 0.3578     | 0.5        | 1         | 0.014      | 12q $m(001)$          |
| Si_2      | Si    | 0.1665     | 0.5019     | 0.2102     | 0.767     | 0.0193     | 24r 1                 |
| Al_1      | Al    | 0.0921(8)  | 0.3578(8)  | 0.5        | 0.767     | 0.014(3)   | 12q $m(001)$          |
| Al_2      | Al    | 0.1665(7)  | 0.5019(7)  | 0.2102(10) | 0.233     | 0.0193(21) | 24r 1                 |
| w7        | O     | 0.132(3)   | 0.0658     | 0.282(7)   | 0.268(20) | 0.065      | 12o $m(010)$          |
| w6        | O     | 0.268(3)   | 0.1338     | 0          | 0.332(31) | 0.065      | 6l $mm2(210)$         |
| w5        | O     | 0          | 0.1570(31) | 0.356(6)   | 0.233(21) | 0.065      | 12n $m(210)$          |
| w4        | O     | 0          | 0          | 0.081(9)   | 0.36(5)   | 0.065      | 2e $6mm(100)$         |
| w3        | O     | 0.1184(31) | 0.237      | 0.159(4)   | 0.485(25) | 0.065      | 12o $m(100)$          |

Table 4: Refinement parameters for dehydrated K-L with m.e., determined from ToF neutron diffraction data collected on the PEARL instrument at ambient pressure

|                                       |             |
|---------------------------------------|-------------|
| data range ( <i>d</i> -spacing) (Å)   | 0.7-4       |
| no. of observations                   | 2948        |
| no. of variables                      | 51          |
| <i>a</i> (Å)                          | 18.3786(15) |
| <i>c</i> (Å)                          | 7.5277(4)   |
| volume (Å <sup>3</sup> )              | 2202.02(21) |
| $R_{exp}$                             | 1.66        |
| $R_{wp}$                              | 1.43        |
| reduced $\chi^2 = (R_{wp}/R_{exp})^2$ | 0.74        |
| GOF = $(R_{wp}/R_{exp})^2$            | 0.86        |

## Compression data

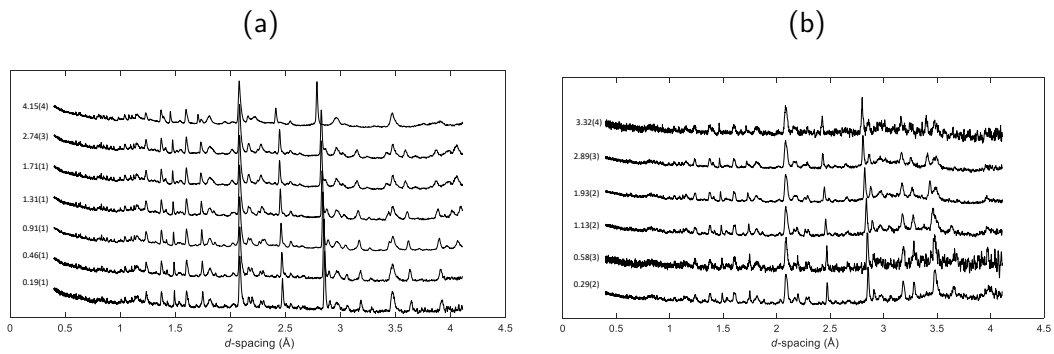

Figure 1: Experimental ToF neutron diffraction patterns with increasing pressure for K-L using (a) Fluorinert as a non-penetrating PTM and (b) a 4:1 mixture of perdeuterated methanol:ethanol (m.e.) as a penetrating PTM. Pressure is given in GPa

# Crystal structures at high-pressures

## Non-penetrating media

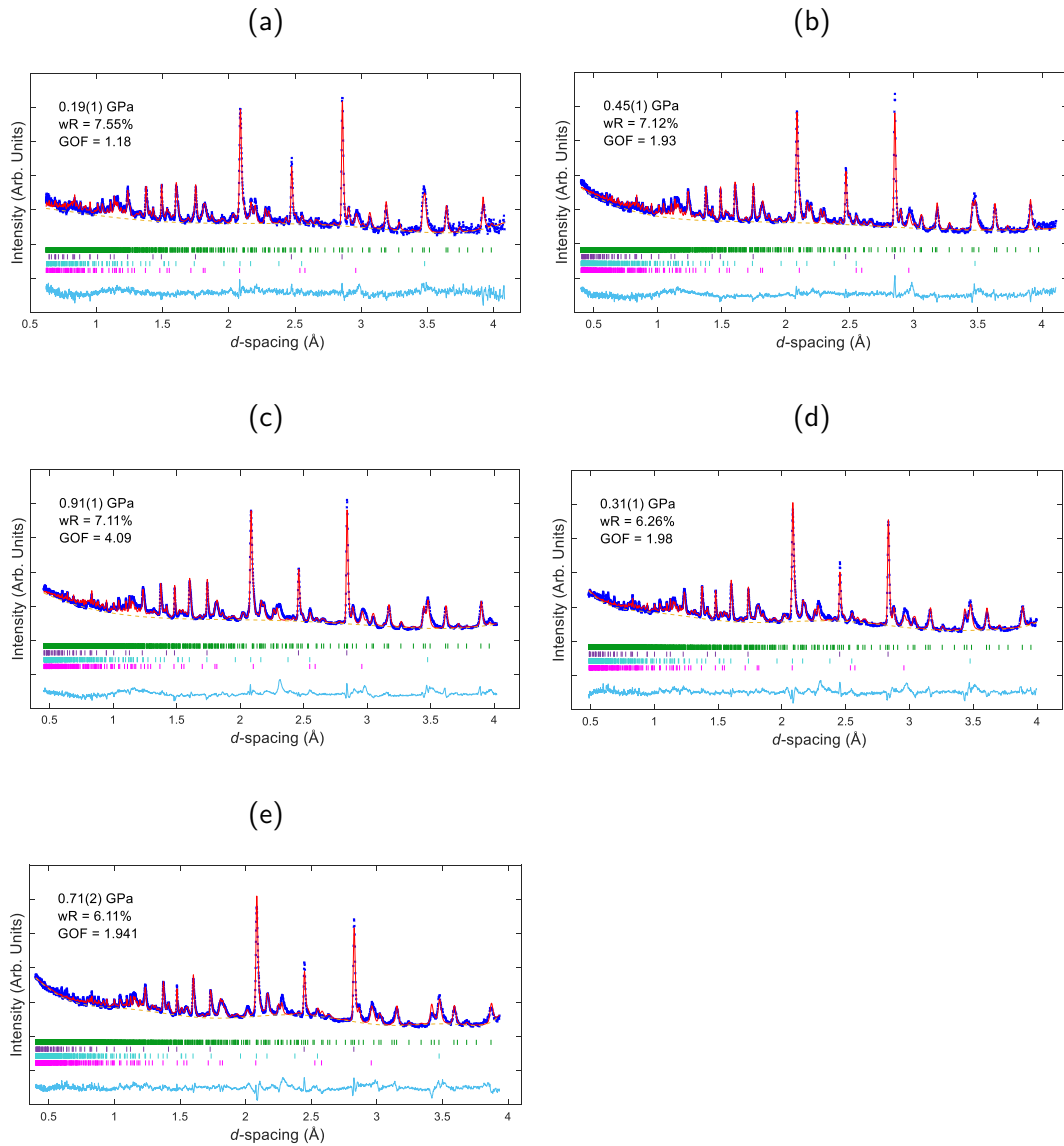

Figure 2: TOF, neutron powder diffraction data with associated Rietveld refinement fits for K-L (a-e) from 0.19(1) to 1.71(2) GPa. Observed and calculated profiles are shown as blue crosses and red lines, respectively. Backgrounds are plotted with orange dotted lines. The residual (observed minus calculated intensity) plot is shown below as a cyan line. Bragg reflections for each phase are marked with vertical bars; K-L in green, Pb in purple, Alumina in cyan and Zirconia in pink.

Table 5: Refined atomic positions, occupancy factors (F), and displacement parameters (Uiso) for K-L at the investigated pressure points where Rietveld refinement was possible. Structures are determined from ToF neutron diffraction data collected on the PEARL instrument, using Fluorinert as a non-penetrating PTM. GASP-simulated structures were used as input models for refinement

| Atom Type   | Label | x          | y          | z          | F    | Uiso  | Wyckoff Site Symmetry |
|-------------|-------|------------|------------|------------|------|-------|-----------------------|
| 0.19(1) GPa |       |            |            |            |      |       |                       |
| K_1         | K     | 0.33333    | 0.66667    | 0.5        | 1    | 0.02  | 2d $-6m2(100)$        |
| K_2         | K     | 0          | 0.5        | 0.5        | 1    | 0.02  | 3g $mmm(010)$         |
| K_1         | K     | 0.33333    | 0.66667    | 0.5        | 1    | 0.02  | 2d $-6m2(100)$        |
| K_2         | K     | 0          | 0.5        | 0.5        | 1    | 0.02  | 3g $mmm(010)$         |
| K_3         | K     | 0          | 0.3178     | 0          | 0.57 | 0.02  | 6j $mm2(010)$         |
| O_1         | O     | 1          | 0.2740(13) | 0.5        | 1    | 0.008 | 6k $mm2(010)$         |
| O_2         | O     | 0.1618(10) | 0.3236     | 0.5        | 1    | 0.008 | 6m $mm2(101)$         |
| O_3         | O     | 0.2660(10) | 0.532      | 0.2432(25) | 1    | 0.008 | 12o $m(100)$          |
| O_4         | O     | 0.1064(8)  | 0.4139(8)  | 0.3254(11) | 1    | 0.008 | 24r 1                 |
| O_5         | O     | 0.4256(10) | 0.8512     | 0.2755(24) | 1    | 0.008 | 12p $m(100)$          |
| O_6         | O     | 0.1457(12) | 0.4798(11) | 1          | 1    | 0.008 | 12p $m(001)$          |
| Si_1        | Si    | 0.0941(7)  | 0.3560(8)  | 0.5        | 1    | 0.008 | 12q $m(001)$          |
| Si_2        | Si    | 0.1672(8)  | 0.4995(7)  | 0.2106(11) | 1    | 0.008 | 24r 1                 |
| 0.45(1) GPa |       |            |            |            |      |       |                       |
| K_1         | K     | 0.33333    | 0.66667    | 0.5        | 1    | 0.02  | 2d $-6m2(100)$        |
| K_2         | K     | 0          | 0.5        | 0.5        | 1    | 0.02  | 3g $mmm(010)$         |
| K_3         | K     | 0          | 0.3178     | 0          | 0.57 | 0.02  | 6j $mm2(010)$         |
| O_1         | O     | 1          | 0.2767(16) | 0.5        | 1    | 0.008 | 6k $mm2(010)$         |
| O_2         | O     | 0.1584(14) | 0.3169     | 0.5        | 1    | 0.008 | 6m $mm2(101)$         |
| O_3         | O     | 0.2665(14) | 0.5331     | 0.2395(28) | 1    | 0.008 | 12o $m(100)$          |
| O_4         | O     | 0.1053(10) | 0.4138(9)  | 0.3249(15) | 1    | 0.008 | 24r 1                 |
| O_5         | O     | 0.4230(14) | 0.846      | 0.2804(26) | 1    | 0.008 | 12p $m(100)$          |
| O_6         | O     | 0.1474(14) | 0.4798(13) | 1          | 1    | 0.008 | 12p $m(001)$          |
| Si_1        | Si    | 0.0942(10) | 0.3568(11) | 0.5        | 1    | 0.008 | 12q $m(001)$          |
| Si_2        | Si    | 0.1684(10) | 0.4998(10) | 0.2093(16) | 1    | 0.008 | 24r 1                 |

## 0.91(1) GPa

|      |    |            |            |            |      |       |                |
|------|----|------------|------------|------------|------|-------|----------------|
| K_1  | K  | 0.33333    | 0.66667    | 0.5        | 1    | 0.02  | 2d $-6m2(100)$ |
| K_2  | K  | 0          | 0.5        | 0.5        | 1    | 0.02  | 3g $mmm(010)$  |
| K_3  | K  | 0          | 0.3178     | 0          | 0.57 | 0.02  | 6j $mm2(010)$  |
| O_1  | O  | 1          | 0.2743(21) | 0.5        | 1    | 0.008 | 6k $mm2(010)$  |
| O_2  | O  | 0.1590(24) | 0.318      | 0.5        | 1    | 0.008 | 6m $mm2(101)$  |
| O_3  | O  | 0.2636(22) | 0.527      | 0.243(4)   | 1    | 0.008 | 12o $m(100)$   |
| O_4  | O  | 0.1035(12) | 0.4119(11) | 0.3236(21) | 1    | 0.008 | 24r 1          |
| O_5  | O  | 0.4223(21) | 0.845      | 0.283(3)   | 1    | 0.008 | 12p $m(100)$   |
| O_6  | O  | 0.1429(16) | 0.4723(15) | 1          | 1    | 0.008 | 12p $m(001)$   |
| Si_1 | Si | 0.0958(17) | 0.3578(16) | 0.5        | 1    | 0.008 | 12q $m(001)$   |
| Si_2 | Si | 0.1675(16) | 0.4968(14) | 0.2148(25) | 1    | 0.008 | 24r 1          |

## 1.31(1) GPa

|      |    |            |            |            |      |       |                |
|------|----|------------|------------|------------|------|-------|----------------|
| K_1  | K  | 0.33333    | 0.66667    | 0.5        | 1    | 0.02  | 2d $-6m2(100)$ |
| K_2  | K  | 0          | 0.5        | 0.5        | 1    | 0.02  | 3g $mmm(010)$  |
| K_3  | K  | 0          | 0.313      | 0          | 0.57 | 0.02  | 6j $mm2(010)$  |
| O_1  | O  | 1          | 0.2733(15) | 0.5        | 1    | 0.008 | 6k $mm2(010)$  |
| O_2  | O  | 0.1584(14) | 0.3168     | 0.5        | 1    | 0.008 | 6m $mm2(101)$  |
| O_3  | O  | 0.2625(14) | 0.525      | 0.2526(30) | 1    | 0.008 | 12o $m(100)$   |
| O_4  | O  | 0.1045(9)  | 0.4125(8)  | 0.3251(14) | 1    | 0.008 | 24r 1          |
| O_5  | O  | 0.4218(13) | 0.8435     | 0.2685(26) | 1    | 0.008 | 12p $m(100)$   |
| O_6  | O  | 0.1425(12) | 0.4687(11) | 1          | 1    | 0.008 | 12p $m(001)$   |
| Si_1 | Si | 0.0938(10) | 0.3556(10) | 0.5        | 1    | 0.008 | 12q $m(001)$   |
| Si_2 | Si | 0.1649(11) | 0.4956(9)  | 0.2133(16) | 1    | 0.008 | 24r 1          |

## 1.71(2) GPa

|      |    |            |            |            |      |       |                |
|------|----|------------|------------|------------|------|-------|----------------|
| K_1  | K  | 0.33333    | 0.66667    | 0.5        | 1    | 0.02  | 2d $-6m2(100)$ |
| K_2  | K  | 0          | 0.5        | 0.5        | 1    | 0.02  | 3g $mmm(010)$  |
| K_3  | K  | 0          | 0.3178     | 0          | 0.57 | 0.02  | 6j $mm2(010)$  |
| O_1  | O  | 1          | 0.2761(16) | 0.5        | 1    | 0.008 | 6k $mm2(010)$  |
| O_2  | O  | 0.1559(14) | 0.3118     | 0.5        | 1    | 0.008 | 6m $mm2(101)$  |
| O_3  | O  | 0.2622(14) | 0.5243     | 0.256(3)   | 1    | 0.008 | 12o $m(100)$   |
| O_4  | O  | 0.1070(10) | 0.4135(9)  | 0.3256(16) | 1    | 0.008 | 24r 1          |
| O_5  | O  | 0.4255(13) | 0.851      | 0.2657(30) | 1    | 0.008 | 12p $m(100)$   |
| O_6  | O  | 0.1387(13) | 0.4633(13) | 1          | 1    | 0.008 | 12p $m(001)$   |
| Si_1 | Si | 0.0926(9)  | 0.3530(11) | 0.5        | 1    | 0.008 | 12q $m(001)$   |
| Si_2 | Si | 0.1643(11) | 0.4966(9)  | 0.2124(17) | 1    | 0.008 | 24r 1          |

Table 6: Refinement parameters for K-L at the investigated pressure points, determined from ToF neutron diffraction data collected on the PEARL instrument using Fluorinert as a non-penetrating PTM

| Pressure (GPa)                        | 0.19(1)    | 0.45(1)    | 0.91(1)    | 1.31(1)    | 1.71(2)    |
|---------------------------------------|------------|------------|------------|------------|------------|
| data range ( $d$ -spacing) (Å)        | 0.6-4      | 0.6-4      | 0.4-4      | 0.48-4     | 0.4-4      |
| no. of observations                   | 3140       | 3881       | 3634       | 3512       | 3809       |
| no. of variables                      | 32         | 32         | 32         | 36         | 36         |
| $a$ (Å)                               | 18.391(5)  | 18.351(5)  | 18.292(6)  | 18.249(4)  | 18.186(5)  |
| $c$ (Å)                               | 7.4791(12) | 7.4567(12) | 7.4300(14) | 7.4015(11) | 7.3673(12) |
| volume (Å <sup>3</sup> )              | 2190.9(7)  | 2174.7(7)  | 2153.0(8)  | 2134.8(6)  | 2110.3(7)  |
| $R_{exp}$                             | 6.40       | 3.69       | 1.74       | 3.16       | 3.20       |
| $R_{wp}$                              | 7.55       | 7.12       | 7.11       | 6.26       | 6.11       |
| reduced $\chi^2 = (R_{wp}/R_{exp})^2$ | 1.39       | 3.72       | 16.73      | 3.92       | 3.65       |
| GOF = $(R_{wp}/R_{exp})$              | 1.18       | 1.93       | 4.09       | 1.98       | 1.91       |

Table 7: Interatomic distances (Å) for K-L at the investigated pressure points

| Pressure (GPa) | $P_{amb}$ | 0.19(1)   | 0.45(1)   | 0.91(1)   | 1.31(1)   | 1.71(2)   |
|----------------|-----------|-----------|-----------|-----------|-----------|-----------|
| T1-O1          | 1.635(2)  | 1.631(10) | 1.613(15) | 1.651(26) | 1.616(15) | 1.562(13) |
| T1-O2          | 1.645(9)  | 1.626(12) | 1.676(18) | 1.65(4)   | 1.658(19) | 1.657(17) |
| T1-O4          | 1.655(2)  | 1.628(7)  | 1.618(11) | 1.605(19) | 1.607(11) | 1.626(11) |
| T2-O3          | 1.657(6)  | 1.623(11) | 1.600(18) | 1.57(3)   | 1.608(18) | 1.621(17) |
| T2-O4          | 1.612(2)  | 1.645(10) | 1.659(15) | 1.616(26) | 1.586(15) | 1.579(15) |
| T2-O5          | 1.659(7)  | 1.647(11) | 1.653(18) | 1.68(3)   | 1.642(18) | 1.622(18) |
| T2-O6          | 1.633(2)  | 1.620(9)  | 1.601(12) | 1.653(18) | 1.641(11) | 1.659(12) |
| Average        | 1.642     | 1.631     | 1.634     | 1.632     | 1.623     | 1.618     |
| K1-O3          | 2.855(2)  | 2.879(12) | 2.881(14) | 2.932(17) | 2.894(13) | 2.873(15) |
| K2-O5          | 2.889(2)  | 2.905(10) | 2.951(11) | 2.937(12) | 3.016(11) | 2.913(13) |
| K3-O4          | 3.031(4)  | 3.069(11) | 3.051(13) | 3.017(15) | 3.047(11) | 3.013(1)  |
| K3-O6          | 2.809(9)  | 2.842(16) | 2.853(18) | 2.732(21) | 2.734(16) | 2.586(19) |



Table 8: Bond angles ( $^{\circ}$ ) for K-L at the investigated pressure points

| Pressure (GPa) | $P_{amb}$  | 0.19(1)   | 0.45(1)   | 0.91(1)   | 1.31(1)   | 1.71(2)   |
|----------------|------------|-----------|-----------|-----------|-----------|-----------|
| T1- O1 - T1    | 130.48(28) | 133.6(14) | 136.0(19) | 133.8(27) | 133.2(18) | 138.2(18) |
| T1- O2 - T1    | 146.841(1) | 143.1(8)  | 134.9(11) | 134.8(18) | 135.7(11) | 133.9(11) |
| T2 - O3 - T2   | 137.01(10) | 138.7(11) | 138.0(13) | 141.8(17) | 140.2(12) | 140.9(14) |
| T2 - O4 - T1   | 144.07(12) | 148.3(8)  | 146.7(11) | 143.6(16) | 147.0(10) | 150.6(11) |
| T2 - O5 - T2   | 141.45(14) | 139.7(11) | 139.6(14) | 141.9(18) | 150.1(14) | 147.0(15) |
| T2 - O6 - T2   | 153.40(16) | 152.9(12) | 153.3(15) | 148.9(21) | 148.1(14) | 141.3(15) |
| Average        | 142.2      | 142.7     | 141.4     | 140.8     | 142.4     | 142.0     |

Table 9: 12-ring channel distances and ellipticity ( $\text{\AA}$ ) for K-L at the investigated pressure points

| Pressure (GPa)     | $P_{amb}$ | 0.19(1)  | 0.45(1)   | 0.91(1)   | 1.31(1)  | 1.71(2)  |
|--------------------|-----------|----------|-----------|-----------|----------|----------|
| O1-O1 [001]        | 10.081(6) | 10.07(3) | 10.15(4)  | 10.03(5)  | 9.97(4)  | 10.02(4) |
| O2-O2 [001]        | 10.465    | 10.77(2) | 10.073(1) | 10.075(5) | 10.013   | 9.847    |
| O1-O1 [100]        | 7.4937(2) | 7.479(1) | 7.457(1)  | 7.430(1)  | 7.402(1) | 7.369(2) |
| 12 ring $\epsilon$ | 1.04      | 1.07     | 1.01      | 1.00      | 1.00     | 1.02     |

Table 10: 8-ring channel distances and ellipticity ( $\text{\AA}$ ) for K-L at the investigated pressure points

| Pressure (GPa)    | $P_{amb}$ | 0.19(1) | 0.45(1) | 0.91(1) | 1.31(1) | 1.71(2) |
|-------------------|-----------|---------|---------|---------|---------|---------|
| O1-O1 [001]       | 8.339(6)  | 8.73(3) | 8.92(2) | 8.97(1) | 8.27(3) | 8.14(4) |
| O5-O5 [001]       | 4.68      | 4.74    | 4.895   | 4.911   | 4.947   | 4.693   |
| O5-O5 [100]       | 3.390(3)  | 4.12(2) | 4.18(2) | 3.23(3) | 3.43(2) | 3.45(3) |
| 8 ring $\epsilon$ | 1.79      | 1.84    | 1.82    | 1.83    | 1.67    | 1.73    |

Table 11: 6-ring channel distances ( $\text{\AA}$ ) for K-L at the investigated pressure points

| Pressure (GPa) | $P_{amb}$ | 0.19(1)  | 0.45(1)  | 0.91(1)  | 1.31(1) | 1.71(2)   |
|----------------|-----------|----------|----------|----------|---------|-----------|
| O3-O5 [001]    | 5.1563(1) | 5.089(1) | 4.982(2) | 5.046(2) | 5.035   | 5.1450(4) |

## Penetrating media

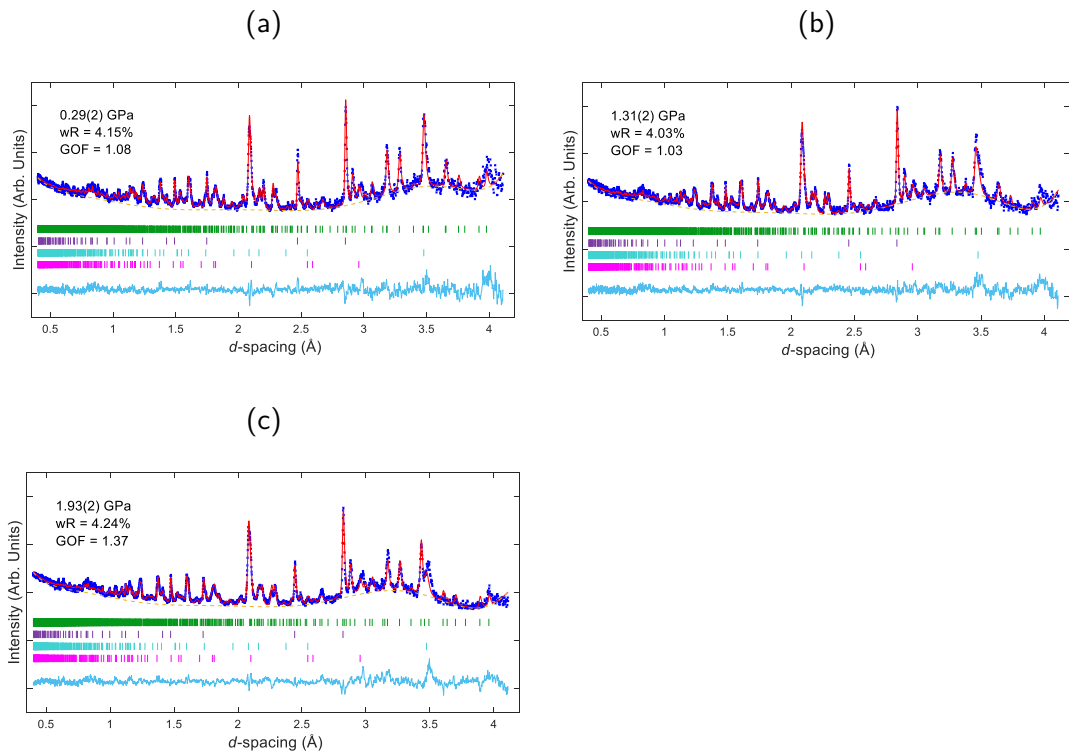

Figure 3: TOF, neutron powder diffraction data with associated Rietveld refinement fits for K-L with m.e. (a-c) from 0.29(2) to 1.93(2) GPa. Observed and calculated profiles are shown as blue crosses and red lines, respectively. Backgrounds are plotted with orange dotted lines. The residual (observed minus calculated intensity) plot is shown below as a cyan line. Bragg reflections for each phase are marked with vertical bars; K-L in green, Pb in purple, Alumina in cyan and Zirconia in pink.

Table 12: Refined atomic positions, occupancy factors (F), and displacement parameters (Uiso) for K-L at the investigated pressure points where Rietveld refinement was possible. Structures are determined from ToF neutron diffraction data collected on the PEARL instrument, using m.e. as a penetrating PTM. GASP-simulated structures were used as input models for refinement

| Atom Type   | Label | x           | y          | z          | F          | Uiso       | Wyckoff Site Symmetry |
|-------------|-------|-------------|------------|------------|------------|------------|-----------------------|
| 0.29(2) GPa |       |             |            |            |            |            |                       |
| K_1         | K     | 0.33333     | 0.66667    | 0.5        | 1          | 0.035(12)  | 2d $-6m2(100)$        |
| K_2         | K     | 0           | 0.5        | 0.5        | 1          | 0.035      | 3g $mmm(010)$         |
| K_3         | K     | 0           | 0.306(5)   | 0          | 0.57       | 0.035      | 6j $mm2(010)$         |
| O_1         | O     | 1           | 0.2717(12) | 0.5        | 1          | 0.0196(13) | 6k $mm2(010)$         |
| O_2         | O     | 0.1670(9)   | 0.334      | 0.5        | 1          | 0.0196     | 6m $mm2(101)$         |
| O_3         | O     | 0.2637(9)   | 0.5274     | 0.2549(22) | 1          | 0.0196     | 12o $m(100)$          |
| O_4         | O     | 0.1043(6)   | 0.4162(7)  | 0.3271(10) | 1          | 0.0196     | 24r 1                 |
| O_5         | O     | 0.4283(10)  | 0.8567     | 0.2728(23) | 1          | 0.0196     | 12p $m(100)$          |
| O_6         | O     | 0.1449(11)  | 0.4783(11) | 0          | 1          | 0.0196     | 12p $m(001)$          |
| Si_1        | Si    | 0.0931(6)   | 0.3589(8)  | 0.5        | 1          | 0.041(4)   | 12q $m(001)$          |
| Si_2        | Si    | 0.1655(7)   | 0.4991(7)  | 0.2123(11) | 1          | 0.041      | 24r 1                 |
| w7          | O     | 0.026(11)   | 0.051      | 0.216(17)  | 0.23(4)    | 0.065      | 12o $m(010)$          |
| w6          | O     | 0.2919(25)  | 0.146      | 0          | 0.89(5)    | 0.065      | 6l $mm2(210)$         |
| w5          | O     | 0           | 0.127(8)   | 0.253(26)  | 0.18(4)    | 0.065      | 12n $m(210)$          |
| w3          | O     | 0.2309(21)  | 0.1154     | 0.180(5)   | 0.77(5)    | 0.065      | 12o $m(100)$          |
| 1.13(2) GPa |       |             |            |            |            |            |                       |
| K_1         | K     | 0.33333     | 0.66667    | 0.5        | 1          | 0.004      | 2d $-6m2(100)$        |
| K_2         | K     | 0           | 0.5        | 0.5        | 1          | 0.004      | 3g $mmm(010)$         |
| K_3         | K     | 0           | 0.314(5)   | 0          | 0.4857(17) | 0.004      | 6j $mm2(010)$         |
| O_1         | O     | 1           | 0.2695(10) | 0.5        | 1          | 0.0052(9)  | 6k $mm2(010)$         |
| O_2         | O     | 0.1715(8)   | 0.3431     | 0.5        | 1          | 0.0052     | 6m $mm2(101)$         |
| O_3         | O     | 0.2634(8)   | 0.5269     | 0.2623(21) | 1          | 0.0052     | 12o $m(100)$          |
| O_4         | O     | 0.1006(6)   | 0.4145(7)  | 0.3240(9)  | 1          | 0.0052     | 24r 1                 |
| O_5         | O     | 0.4291(9)   | 0.8582     | 0.2707(21) | 1          | 0.0052     | 12p $m(100)$          |
| O_6         | O     | 0.1463(10)  | 0.4768(9)  | 0          | 1          | 0.0052     | 12p $m(001)$          |
| Si_1        | Si    | 0.0916(6)   | 0.3590(7)  | 0.5        | 1          | 0.045(5)   | 12q $m(001)$          |
| Si_2        | Si    | 0.1648(7)   | 0.4980(7)  | 0.2138(11) | 1          | 0.045      | 24r 1                 |
| w7          | O     | 0.02441(20) | 0.04882    | 0.218(17)  | 0.20(3)    | 0.065      | 12o $m(010)$          |
| w6          | O     | 0.2883(24)  | 0.1441     | 0          | 1          | 0.065      | 6l $mm2(210)$         |
| w5          | O     | 0           | 0.115(5)   | 0.264(17)  | 0.31(5)    | 0.065      | 12n $m(210)$          |
| w3          | O     | 0.2276(20)  | 0.1138     | 0.178(5)   | 0.89(6)    | 0.065      | 12o $m(100)$          |
| K_4         | K     | 0           | 0.5        | 0          | 0.2        | 0.004      | 3f $mmm(010)$         |

| 1.93(2) GPa |    |            |            |            |         |           |                |
|-------------|----|------------|------------|------------|---------|-----------|----------------|
| K_1         | K  | 0.33333    | 0.66667    | 0.5        | 1       | 0.026(6)  | 2d $-6m2(100)$ |
| K_2         | K  | 0          | 0.5        | 0.5        | 1       | 0.026     | 3g $mmm(010)$  |
| K_3         | K  | 0          | 0.311(8)   | 0          | 0.25    | 0.026     | 6j $mm2(010)$  |
| O_1         | O  | 1          | 0.2705(11) | 0.5        | 1       | 0.0079(9) | 6k $mm2(010)$  |
| O_2         | O  | 0.1673(10) | 0.3346     | 0.5        | 1       | 0.0079    | 6m $mm2(101)$  |
| O_3         | O  | 0.2708(10) | 0.5418     | 0.2266(18) | 1       | 0.0079    | 12o $m(100)$   |
| O_4         | O  | 0.1020(6)  | 0.4135(6)  | 0.3234(11) | 1       | 0.0079    | 24r 1          |
| O_5         | O  | 0.4195(10) | 0.8389     | 0.2892(17) | 1       | 0.0079    | 12p $m(100)$   |
| O_6         | O  | 0.1455(10) | 0.4784(9)  | 0          | 1       | 0.0079    | 12p $m(001)$   |
| Si_1        | Si | 0.0910(8)  | 0.3579(8)  | 0.5        | 1       | 0.046(4)  | 12q $m(001)$   |
| Si_2        | Si | 0.1688(8)  | 0.4989(7)  | 0.2109(13) | 1       | 0.046     | 24r 1          |
| w7          | O  | 0.021(19)  | 0.0405     | 0.217(24)  | 0.13(5) | 0.065     | 12o $m(010)$   |
| w6          | O  | 0.2865(26) | 0.1432     | 0          | 0.68(5) | 0.065     | 6l $mm2(210)$  |
| w5          | O  | 0          | 0.120(4)   | 0.289(12)  | 0.47(5) | 0.065     | 12n $m(210)$   |
| w3          | O  | 0.223(4)   | 0.1116     | 0.201(14)  | 0.33(5) | 0.065     | 12o $m(100)$   |
| K_4         | K  | 0          | 0.5        | 0          | 0.631   | 0.026     | 3f $mmm(010)$  |

Table 13: Refinement parameters for K-L at the investigated pressure points, determined from ToF neutron diffraction data collected on the PEARL instrument using m.e. as a penetrating PTM

| Pressure (GPa)                              | 0.29(2)    | 1.13(2)    | 1.93(2)    |
|---------------------------------------------|------------|------------|------------|
| data range ( $d$ -spacing) ( $\text{\AA}$ ) | 0.4-4      | 0.4-4      | 0.4-4      |
| no. of observations                         | 3881       | 3881       | 3881       |
| no. of variables                            | 51         | 48         | 51         |
| $a$ ( $\text{\AA}$ )                        | 18.364(4)  | 18.324(4)  | 18.291(4)  |
| $c$ ( $\text{\AA}$ )                        | 7.5108(11) | 7.4583(12) | 7.3987(10) |
| volume ( $\text{\AA}^3$ )                   | 2193.6(5)  | 2168.5(6)  | 2143.6(6)  |
| $R_{exp}$                                   | 3.84       | 3.91       | 3.98       |
| $R_{wp}$                                    | 4.15       | 4.03       | 4.24       |
| reduced $\chi^2 = (R_{wp}/R_{exp})^2$       | 1.17       | 1.06       | 1.88 6     |
| GOF = $(R_{wp}/R_{exp})$                    | 1.08       | 1.03       | 1.37       |

Table 14: Interatomic distances ( $\text{\AA}$ ) for K-L with m.e. at the investigated pressure points.

| Pressure (GPa) | $P_{amb}$  | 0.29(2)   | 1.13(2)   | 1.93(2)   |
|----------------|------------|-----------|-----------|-----------|
| T1-O1          | 1.656(6)   | 1.658(9)  | 1.660(9)  | 1.632(11) |
| T1-O2          | 1.658(24)  | 1.635(11) | 1.630(10) | 1.650(13) |
| T1-O4          | 1.650(6)   | 1.619(7)  | 1.618(6)  | 1.605(8)  |
| T2-O3          | 1.631(19)  | 1.639(11) | 1.650(10) | 1.627(13) |
| T2-O4          | 1.663(7)   | 1.616(9)  | 1.613(9)  | 1.648(11) |
| T2-O5          | 1.604(24)  | 1.641(11) | 1.645(10) | 1.673(13) |
| T2-O6          | 1.6478(24) | 1.639(8)  | 1.636(8)  | 1.612(10) |
| Average T-O    | 1.644      | 1.635     | 1.636     | 1.635     |
| K1-O3          | 2.911(6)   | 2.879(11) | 2.840(10) | 2.830(9)  |
| K2-O5          | 2.888(5)   | 2.847(10) | 2.826(9)  | 2.991(7)  |
| K3-O4          | 3.137(15)  | 3.147(29) | 3.040(28) | 3.03(5)   |
| K3-O6          | 2.988(30)  | 2.94(6)   | 2.82(6)   | 2.88(10)  |
| K4-O5          |            |           | 3.023(10) | 3.330(8)  |
| K4-O6          |            |           | 2.918(19) | 2.880(19) |
| K3-w6          | 2.80(5)    | 2.82(5)   | 2.90(6)   | 2.87(10)  |
| K3-w3          | 3.16(5)    | 3.35(7)   | 3.45(7)   | 3.50(13)  |
| w3-O2          | 2.964(25)  | 2.91(4)   | 3.02(3)   | 2.83(9)   |
| w5-O1          | 2.44(6)    | 3.24(18)  | 3.34(9)   | 3.17(8)   |
| w3-w7          | 1.91(6)    | 2.87(4)   | 2.852(31) | 3.3(3)    |
| w3-w6          | 1.29(3)    | 1.67(3)   | 1.64(3)   | 1.79(9)   |
| w3-w5          | 2.43(5)    | 2.09(8)   | 2.17((8)  | 2.08(6)   |
| w4-w7          | 2.58(6)    |           |           |           |
| w5-w7          | 3.11(6)    | 1.70(26)  | 1.52(9)   | 1.74(27)  |
| w6-w7          | 3.03(7)    | 4.15(6)   | 4.13(4)   | 4.20(7)   |

Water sites with interatomic separations less than 2.5  $\text{\AA}$  are not likely to be simultaneously occupied. Although data quality did not permit unambiguous distinctions between water and methanol in the pores, it is plausible that both molecules may be found at w3 and w6 sites but are more mobile than the fixed crystallographic positions account for.

Table 15: Bond angles ( $^{\circ}$ ) for K-L with m.e. at the investigated pressure points

| Pressure (GPa) | $P_{amb}$  | 0.29(2)  | 1.13(2)   | 1.93(2)   |
|----------------|------------|----------|-----------|-----------|
| T1- O1 - T1    | 130.48(28) | 124.5(8) | 126.5(12) | 122.3(11) |
| T1- O2 - T1    | 146.841(1) | 148.463  | 152.0(8)  | 162.1(8)  |
| T2 - O3 - T2   | 137.01(10) | 144.2(4) | 140.5(10) | 138.5(10) |
| T2 - O4 - T1   | 144.07(12) | 145.7(4) | 147.4(7)  | 143.8(6)  |
| T2 - O5 - T2   | 141.45(14) | 137.6(5) | 138.9(10) | 140.2(9)  |
| T2 - O6 - T2   | 153.40(16) | 147.6(6) | 153.2(11) | 154.1(10) |
| Average        | 142.2      | 141.3    | 143.1     | 143.5     |

Table 16: 12-ring channel distances and ellipticity ( $\text{\AA}$ ) for K-L with m.e. at the investigated pressure points

| Pressure (GPa)     | $P_{amb}$ | 0.29(2)  | 1.13(2)  | 1.93(2)  |
|--------------------|-----------|----------|----------|----------|
| O1-O1 [001]        | 9.92(2)   | 9.98(3)  | 9.88(3)  | 9.89(3)  |
| O2-O2 [001]        | 10.488    | 10.595   | 10.43(2) | 10.6     |
| O1-O1 [100]        | 7.5277(4) | 7.511(1) | 7.458(1) | 7.398(1) |
| 12 ring $\epsilon$ | 1.06      | 1.06     | 1.06     | 1.07     |

Table 17: 8-ring channel distances and ellipticity ( $\text{\AA}$ ) for K-L with m.e. at the investigated pressure points

| Pressure (GPa)    | $P_{amb}$ | 0.29(2) | 1.13(2) | 1.93(2) |
|-------------------|-----------|---------|---------|---------|
| O1-O1 [001]       | 8.58(2)   | 8.38(3) | 8.44(3) | 8.39(3) |
| O5-O5 [001]       | 4.68      | 4.558   | 4.5     | 5.104   |
| O5-O5 [100]       | 3.38(1)   | 3.41(2) | 3.42(2) | 3.11(2) |
| 8 ring $\epsilon$ | 1.83      | 1.84    | 1.88    | 1.72    |

Table 18: 6-ring channel distances ( $\text{\AA}$ ) for K-L with m.e. at the investigated pressure points

| Pressure (GPa) | $P_{amb}$ | 0.29(2)  | 1.13(2)   | 1.93(2)  |
|----------------|-----------|----------|-----------|----------|
| O3-O5 [001]    | 5.1860(5) | 5.239(2) | 5.2578(3) | 4.729(2) |

## **GASP simulations**

### **Non-penetrating media**

Table 19: Refinement parameters showing how well the simulated K-L models fit the data before refining atomic coordinates

|                          | 0.19(1)    | 0.45(1)    | 0.91(1)    | 1.31(1)    | 1.71(2)    | 2.74(3)    | 4.15(4)    |
|--------------------------|------------|------------|------------|------------|------------|------------|------------|
| Pressure (GPa)           |            |            |            |            |            |            |            |
| $d$ -spacing range (Å)   | 0.6-4      | 0.6-4      | 0.4-4      | 0.48-4     | 0.4-4      | 0.6-0.4    | 0.6-0.4    |
| no. of obs               | 3140       | 3881       | 3634       | 3512       | 3809       | 3089       | 3183       |
| no. of var               | 11         | 22         | 21         | 20         | 25         | 20         | 16         |
| $a$ (Å)                  | 18.390(5)  | 18.349(5)  | 18.287(7)  | 18.246(5)  | 18.178(7)  | 17.910(15) | 17.627(18) |
| $c$ (Å)                  | 7.4796(13) | 7.4549(11) | 7.4289(16) | 7.3980(13) | 7.3655(18) | 7.257(4)   | 7.100(5)   |
| volume (Å <sup>3</sup> ) | 2190.6(7)  | 2173.6(6)  | 2151.4(9)  | 2132.8(7)  | 2107.8(10) | 2016.0(21) | 1910.6(24) |
| $R_{exp}$                | 6.41       | 3.77       | 1.74       | 3.16       | 3.21       | 3.03       | 2.74       |
| $R_{wp}$                 | 7.76       | 5.24       | 6.04       | 7.17       | 6.74       | 7.43       | 9.14       |
| reduced $\chi^2$         | 1.46       | 1.93       | 12.04      | 5.15       | 4.41       | 6.00       | 11.16      |
| GOF                      | 1.21       | 1.39       | 3.47       | 2.27       | 2.1        | 2.45       | 3.34       |
| Average T-O fixed (Å)    | 1.642      | 1.642      | 1.642      | 1.642      | 1.642      | 1.61       | 1.60       |



Table 20: Bond angles ( $^{\circ}$ ) of simulated K-L structures

| Pressure (GPa) | 0.19(1) | 0.45(1) | 0.91(1) | 1.31(1) | 1.71(2) | 2.74(3) | 4.15(4) |
|----------------|---------|---------|---------|---------|---------|---------|---------|
| T1- O1 - T1    | 125.978 | 121.6   | 118.914 | 116.823 | 114.379 | 118.079 | 112.17  |
| T1- O2 - T1    | 152.923 | 157.303 | 159.992 | 162.084 | 164.529 | 160.826 | 166.742 |
| T2 - O3 - T2   | 141.521 | 142.708 | 143.305 | 143.722 | 144.162 | 143.278 | 148.704 |
| T2 - O4 - T1   | 142.264 | 139.719 | 138.009 | 136.536 | 134.914 | 136.781 | 119.85  |
| T2 - O5 - T2   | 140.739 | 141.704 | 141.791 | 141.491 | 141.229 | 140.089 | 136.852 |
| T2 - O6 - T2   | 161.261 | 162.861 | 164.223 | 165.588 | 166.948 | 166.401 | 166.14  |
| Average        | 144.11  | 144.32  | 144.37  | 144.37  | 144.36  | 144.24  | 141.74  |

Table 21: 12-ring channel distances and ellipticity ( $\text{\AA}$ ) of simulated K-L structures

| Pressure (Gpa)     | 0.19(1) | 0.45(1) | 0.91(1) | 1.31(1) | 1.71(2) | 2.74(3) | 4.15(4) |
|--------------------|---------|---------|---------|---------|---------|---------|---------|
| O1-O1 [001]        | 9.855   | 9.798   | 9.693   | 9.608   | 9.504   | 9.471   | 9.167   |
| O2-O2 [001]        | 10.633  | 10.659  | 10.683  | 10.697  | 10.709  | 10.48   | 10.443  |
| O1-O1 [100]        | 7.479   | 7.456   | 7.428   | 7.397   | 7.365   | 7.231   | 7.117   |
| 12 ring $\epsilon$ | 1.079   | 1.088   | 1.102   | 1.113   | 1.127   | 1.107   | 1.139   |

Table 22: 8-ring channel distances and ellipticity ( $\text{\AA}$ ) of simulated K-L structures

| Pressure (Gpa)    | 0.19(1) | 0.45(1) | 0.91(1) | 1.31(1) | 1.71(2) | 2.74(3) | 4.15(4) |
|-------------------|---------|---------|---------|---------|---------|---------|---------|
| O1-O1 [001]       | 8.506   | 8.551   | 8.601   | 8.639   | 8.68    | 8.455   | 8.49    |
| O5-O5 [001]       | 4.734   | 4.733   | 4.729   | 4.724   | 4.715   | 4.638   | 4.611   |
| O5-O5 [100]       | 3.28    | 3.243   | 3.196   | 3.14    | 3.085   | 3.028   | 2.804   |
| 8 ring $\epsilon$ | 1.797   | 1.807   | 1.819   | 1.829   | 1.841   | 1.823   | 1.841   |

Table 23: 6-ring channel distances ( $\text{\AA}$ ) of simulated K-L structures

| Pressure (Gpa) | 0.19(1) | 0.45(1) | 0.91(1) | 1.31(1) | 1.71(2) | 2.74(3) | 4.15(4) |
|----------------|---------|---------|---------|---------|---------|---------|---------|
| O3-O5 [001]    | 5.241   | 5.255   | 5.27    | 5.28    | 5.291   | 5.17    | 5.159   |

Table 24: Polyhedral rotation output from GASP: magnitude of T1 anti-rotations in 12 MR at investigated pressures w.r.t  $P_{amb}$

| Rx          | Ry   | Rz    | Rotation (°) |
|-------------|------|-------|--------------|
| 0.19(1) GPa |      |       |              |
| 0.00        | 0.00 | 0.10  | 5.69         |
| 0.00        | 0.00 | -0.10 | 5.69         |
| 0.46(1) GPa |      |       |              |
| 0.00        | 0.00 | 0.11  | 6.49         |
| 0.00        | 0.00 | -0.11 | 6.48         |
| 0.91(1) GPa |      |       |              |
| 0.00        | 0.00 | 0.13  | 7.67         |
| 0.00        | 0.00 | -0.13 | 7.66         |
| 1.31(1) GPa |      |       |              |
| 0.00        | 0.00 | 0.13  | 7.67         |
| 0.00        | 0.00 | -0.13 | 7.66         |
| 1.71(2) GPa |      |       |              |
| 0.00        | 0.00 | 0.17  | 9.75         |
| 0.00        | 0.00 | -0.17 | 9.74         |

Table 25: Polyhedral rotation output from GASP: magnitude of T2 anti-rotations at investigated pressures w.r.t  $P_{amb}$

| Rx          | Ry    | Rz    | Rotation (°) |
|-------------|-------|-------|--------------|
| 0.19(1) GPa |       |       |              |
| 0.04        | -0.05 | -0.06 | 5.02         |
| -0.04       | 0.05  | -0.06 | 5.02         |
| 0.04        | 0.05  | 0.06  | 5.02         |
| -0.04       | -0.05 | 0.06  | 5.02         |
| -0.02       | 0.06  | 0.06  | 5.02         |
| 0.02        | 0.06  | -0.06 | 5.02         |
| -0.02       | -0.06 | -0.06 | 5.02         |
| 0.02        | -0.06 | 0.06  | 5.02         |
| -0.07       | -0.01 | -0.06 | 5.02         |
| 0.07        | 0.01  | -0.06 | 5.02         |
| -0.07       | 0.01  | 0.06  | 5.02         |
| 0.07        | -0.01 | 0.06  | 5.02         |
| 0.46(1) GPa |       |       |              |
| 0.05        | -0.06 | -0.07 | 5.78         |
| -0.05       | 0.06  | -0.07 | 5.78         |
| 0.05        | 0.06  | 0.07  | 5.77         |
| -0.05       | -0.06 | 0.07  | 5.77         |
| 0.03        | 0.07  | -0.07 | 5.78         |
| -0.03       | -0.07 | -0.07 | 5.78         |
| 0.03        | -0.07 | 0.07  | 5.77         |
| -0.03       | 0.07  | 0.07  | 5.77         |
| -0.08       | -0.01 | -0.07 | 5.78         |
| 0.08        | 0.01  | -0.07 | 5.78         |
| -0.08       | 0.01  | 0.07  | 5.77         |
| -0.08       | 0.01  | 0.07  | 5.77         |

| Rx          | Ry    | Rz    | Rotation (°) |
|-------------|-------|-------|--------------|
| 1.31(1) GPa |       |       |              |
| 0.05        | -0.07 | -0.08 | 6.68         |
| -0.05       | 0.07  | -0.08 | 6.68         |
| 0.05        | 0.07  | 0.08  | 6.68         |
| -0.05       | -0.07 | 0.08  | 6.68         |
| 0.03        | 0.08  | -0.08 | 6.68         |
| -0.03       | -0.08 | -0.08 | 6.68         |
| 0.03        | -0.08 | 0.08  | 6.68         |
| -0.03       | 0.08  | 0.08  | 6.68         |
| -0.09       | -0.01 | -0.08 | 6.68         |
| 0.09        | 0.01  | -0.08 | 6.68         |
| -0.09       | 0.01  | 0.08  | 6.68         |
| 0.09        | -0.01 | 0.08  | 6.68         |
| 1.71(2) GPa |       |       |              |
| 0.07        | -0.09 | -0.10 | 8.60         |
| -0.07       | 0.09  | -0.10 | 8.60         |
| 0.07        | 0.09  | 0.10  | 8.60         |
| -0.07       | -0.09 | 0.10  | 8.60         |
| 0.04        | 0.10  | -0.10 | 8.60         |
| -0.04       | -0.10 | -0.10 | 8.60         |
| 0.04        | -0.10 | 0.10  | 8.60         |
| -0.04       | 0.10  | 0.10  | 8.60         |
| -0.11       | -0.02 | -0.10 | 8.60         |
| 0.11        | 0.02  | -0.10 | 8.60         |
| -0.11       | 0.02  | 0.10  | 8.60         |
| 0.11        | -0.02 | 0.10  | 8.60         |

## Penetrating media

Table 26: Refinement parameters showing how well the simulated K-L models fit the data before refining atomic coordinates. At pressures of 0.58 and 3.32 GPa, data quality prevented unambiguous refinements and only lattice parameters could be extracted by the Le Bail method

|                                       | 0.29(2)    | 0.58(2)   | 1.13(2)    | 1.93(2)    | 2.89(2)    | 3.32(4)   |
|---------------------------------------|------------|-----------|------------|------------|------------|-----------|
| Pressure (GPa)                        |            |           |            |            |            |           |
| d-spacing range (Å)                   | 0.4-4      | 0.4-4     | 0.4-4      | 0.4-4      | 0.4-4      | 0.4-4     |
| no. of obs                            | 3881       | 3881      | 3881       | 3881       | 3881       | 3881      |
| no. of var                            | 23         |           | 20         | 23         | 33         |           |
| a (Å)                                 | 18.362(4)  | 18.355(6) | 18.323(4)  | 18.295(5)  | 18.271(9)  | 18.255(1) |
| c (Å)                                 | 7.5094(11) | 7.497(2)  | 7.4590(13) | 7.3950(13) | 7.3361(25) | 7.314(2)  |
| volume (Å <sup>3</sup> )              | 2192.6(6)  | 2187.6(9) | 2168.6(6)  | 2143.6(7)  | 2121.0(12) | 2110(2)   |
| $R_{exp}$                             | 3.85       |           | 3.93       | 3.10       | 4.21       |           |
| $R_{wp}$                              | 4.58       |           | 4.28       | 4.96       | 5.31       |           |
| reduced $\chi^2 = (R_{wp}/R_{exp})^2$ | 1.42       |           | 1.19       | 2.56       | 1.59       |           |
| $GOF = (R_{wp}/R_{exp})$              | 1.19       |           | 1.09       | 1.6        | 1.26       |           |
| Average T-O fixed (Å)                 | 1.642      | 1.642     | 1.642      | 1.642      | 1.642      | 1.642     |

Table 27: Bond angles ( $^{\circ}$ ) of simulated K-L structures

| Pressure (GPa) | 0.29(2) | 0.58(2) | 1.13(2) | 1.93(2) | 2.89(3) | 3.32(4) |
|----------------|---------|---------|---------|---------|---------|---------|
| T1- O1 - T1    | 122.974 | 122.333 | 120.523 | 118.902 | 117.249 | 116.718 |
| T1- O2 - T1    | 155.929 | 156.569 | 158.382 | 160.003 | 161.657 | 162.189 |
| T2 - O3 - T2   | 142.484 | 142.63  | 142.999 | 143.236 | 143.488 | 143.525 |
| T2 - O4 - T1   | 141.263 | 140.768 | 139.287 | 137.492 | 135.804 | 135.176 |
| T2 - O5 - T2   | 142.969 | 142.868 | 142.307 | 140.713 | 135.804 | 138.675 |
| T2 - O6 - T2   | 160.529 | 161.055 | 162.778 | 165.424 | 167.64  | 168.516 |
| Average        | 144.36  | 144.37  | 144.38  | 144.30  | 143.61  | 144.13  |

Table 28: 12-ring channel distances and ellipticity ( $\text{\AA}$ ) of simulated K-L structures

| Pressure (GPa)     | 0.29(2) | 0.58(2) | 1.13(2) | 1.93(2) | 2.89(3) | 3.32(4) |
|--------------------|---------|---------|---------|---------|---------|---------|
| O1-O1 [001]        | 9.849   | 9.825   | 9.756   | 9.693   | 9.626   | 9.604   |
| O2-O2 [001]        | 10.644  | 10.651  | 10.669  | 10.683  | 10.694  | 10.698  |
| O1-O1 [100]        | 7.508   | 7.497   | 7.46    | 7.397   | 7.339   | 7.314   |
| 12 ring $\epsilon$ | 1.081   | 1.084   | 1.094   | 1.102   | 1.111   | 1.114   |

Table 29: 8-ring channel distances and ellipticity ( $\text{\AA}$ ) of simulated K-L structures

| Pressure (GPa)    | 0.29(2) | 0.58(2) | 1.13(2) | 1.93(2) | 2.89(3) | 3.32(4) |
|-------------------|---------|---------|---------|---------|---------|---------|
| O1-O1 [001]       | 8.516   | 8.53    | 8.569   | 8.606   | 8.64    | 8.651   |
| O5-O5 [001]       | 4.73    | 4.73    | 4.731   | 4.732   | 4.73    | 4.729   |
| O5-O5 [100]       | 3.349   | 3.328   | 3.257   | 3.131   | 3.02    | 2.973   |
| 8 ring $\epsilon$ | 1.800   | 1.803   | 1.811   | 1.819   | 1.827   | 1.829   |

Table 30:  $D6r$  distances ( $\text{\AA}$ ) of simulated K-L structures

| Pressure (GPa) | 0.29(2) | 0.58(2) | 1.13(2) | 1.93(2) | 2.89(3) | 3.32(4) |
|----------------|---------|---------|---------|---------|---------|---------|
| O3-O5 [001]    | 5.249   | 5.252   | 5.262   | 5.269   | 5.275   | 5.277   |

Table 31: Polyhedral rotation output from GASP: magnitude of initial T1 anti-rotations in the 12MR at investigated pressures w.r.t  $P_{amb}$

| Rx          | Ry   | Rz    | Rotation (°) |
|-------------|------|-------|--------------|
| 0.29(2) GPa |      |       |              |
| 0.00        | 0.00 | 0.11  | 6.20         |
| 0.00        | 0.00 | -0.11 | 6.19         |

Table 32: Polyhedral rotation output from GASP: magnitude of initial T2 anti-rotations at investigated pressures w.r.t  $P_{amb}$

| Rx          | Ry    | Rz    | Rotation (°) |
|-------------|-------|-------|--------------|
| 0.29(2) GPa |       |       |              |
| 0.03        | -0.05 | -0.06 | 4.76         |
| -0.03       | 0.05  | -0.06 | 4.76         |
| 0.03        | 0.05  | 0.06  | 4.76         |
| -0.03       | -0.05 | 0.06  | 4.76         |
| 0.03        | 0.05  | -0.06 | 4.76         |
| -0.03       | -0.05 | -0.06 | 4.76         |
| 0.03        | -0.05 | 0.06  | 4.76         |
| -0.03       | 0.05  | 0.06  | 4.76         |
| -0.05       | 0.00  | -0.06 | 4.76         |
| 0.05        | 0.00  | -0.06 | 4.76         |
| -0.05       | 0.00  | 0.06  | 4.76         |
| 0.05        | 0.00  | 0.06  | 4.76         |

Table 33: Polyhedral rotation output from GASP: magnitude of T1 anti-rotations in 12 MR at investigated pressures w.r.t filled structure at 0.29(2) GPa

| Rx          | Ry   | Rz    | Rotation (°) |
|-------------|------|-------|--------------|
| 1.13(2) GPa |      |       |              |
| 0.00        | 0.00 | 0.02  | 0.92         |
| 0.00        | 0.00 | -0.02 | 0.92         |
| 1.93(2) GPa |      |       |              |
| 0.00        | 0.00 | 0.03  | 1.57         |
| 0.00        | 0.00 | -0.03 | 1.57         |
| 2.89(2) GPa |      |       |              |
| 0.00        | 0.00 | 0.04  | 2.27         |
| 0.00        | 0.00 | -0.04 | 2.27         |
| 3.32(4) GPa |      |       |              |
| 0.00        | 0.00 | 0.04  | 2.50         |
| 0.00        | 0.00 | -0.04 | 2.50         |



Table 34: Polyhedral rotation output from GASP: magnitude of T2 anti-rotations at investigated pressures w.r.t filled structure at 0.29(2) GPa

| Rx          | Ry    | Rz    | Rotation (°) |
|-------------|-------|-------|--------------|
| 1.13(2) GPa |       |       |              |
| 0.01        | -0.02 | -0.01 | 1.34         |
| -0.01       | 0.02  | -0.01 | 1.34         |
| 0.01        | 0.02  | 0.01  | 1.34         |
| -0.01       | -0.02 | 0.01  | 1.34         |
| 0.01        | 0.02  | -0.01 | 1.34         |
| -0.01       | -0.02 | -0.01 | 1.34         |
| 0.01        | -0.02 | 0.01  | 1.34         |
| -0.01       | 0.02  | 0.01  | 1.34         |
| -0.02       | 0.00  | -0.01 | 1.34         |
| 0.02        | 0.00  | -0.01 | 1.34         |
| -0.02       | 0.00  | 0.01  | 1.34         |
| 0.02        | 0.00  | 0.01  | 1.34         |
| 1.93(2) GPa |       |       |              |
| 0.03        | -0.03 | -0.01 | 2.76         |
| -0.03       | 0.03  | -0.01 | 2.76         |
| 0.03        | 0.03  | 0.01  | 2.76         |
| -0.03       | -0.03 | 0.01  | 2.76         |
| 0.01        | 0.04  | -0.01 | 2.76         |
| -0.01       | -0.04 | -0.01 | 2.76         |
| 0.01        | -0.04 | 0.01  | 2.76         |
| -0.01       | 0.04  | 0.01  | 2.76         |
| -0.04       | -0.01 | -0.01 | 2.76         |
| 0.04        | 0.01  | -0.01 | 2.76         |
| -0.04       | 0.01  | 0.01  | 2.76         |
| 0.04        | -0.01 | 0.01  | 2.76         |

| 2.89(3) GPa |       |  |       |      |
|-------------|-------|--|-------|------|
| 0.05        | -0.05 |  | -0.02 | 4.07 |
| -0.05       | 0.05  |  | -0.02 | 4.07 |
| 0.05        | 0.05  |  | 0.02  | 4.07 |
| -0.05       | -0.05 |  | 0.02  | 4.07 |
| 0.02        | 0.06  |  | -0.02 | 4.07 |
| -0.02       | -0.06 |  | -0.02 | 4.07 |
| 0.02        | -0.06 |  | 0.02  | 4.07 |
| -0.02       | 0.06  |  | 0.02  | 4.07 |
| -0.07       | -0.01 |  | -0.02 | 4.07 |
| 0.07        | 0.01  |  | -0.02 | 4.07 |
| -0.07       | 0.01  |  | 0.02  | 4.07 |
| 0.07        | -0.01 |  | 0.02  | 4.07 |
| 3.32(4) GPa |       |  |       |      |
| 0.05        | -0.06 |  | -0.02 | 4.57 |
| -0.05       | 0.06  |  | -0.02 | 4.57 |
| 0.05        | 0.06  |  | 0.02  | 4.57 |
| -0.05       | -0.06 |  | 0.02  | 4.57 |
| 0.02        | 0.07  |  | -0.02 | 4.57 |
| -0.02       | -0.07 |  | -0.02 | 4.57 |
| 0.02        | -0.07 |  | 0.02  | 4.57 |
| -0.02       | 0.07  |  | 0.02  | 4.57 |
| -0.07       | -0.02 |  | -0.02 | 4.57 |
| 0.07        | 0.02  |  | -0.02 | 4.57 |
| -0.07       | 0.02  |  | 0.02  | 4.57 |
| 0.07        | -0.02 |  | 0.02  | 4.57 |

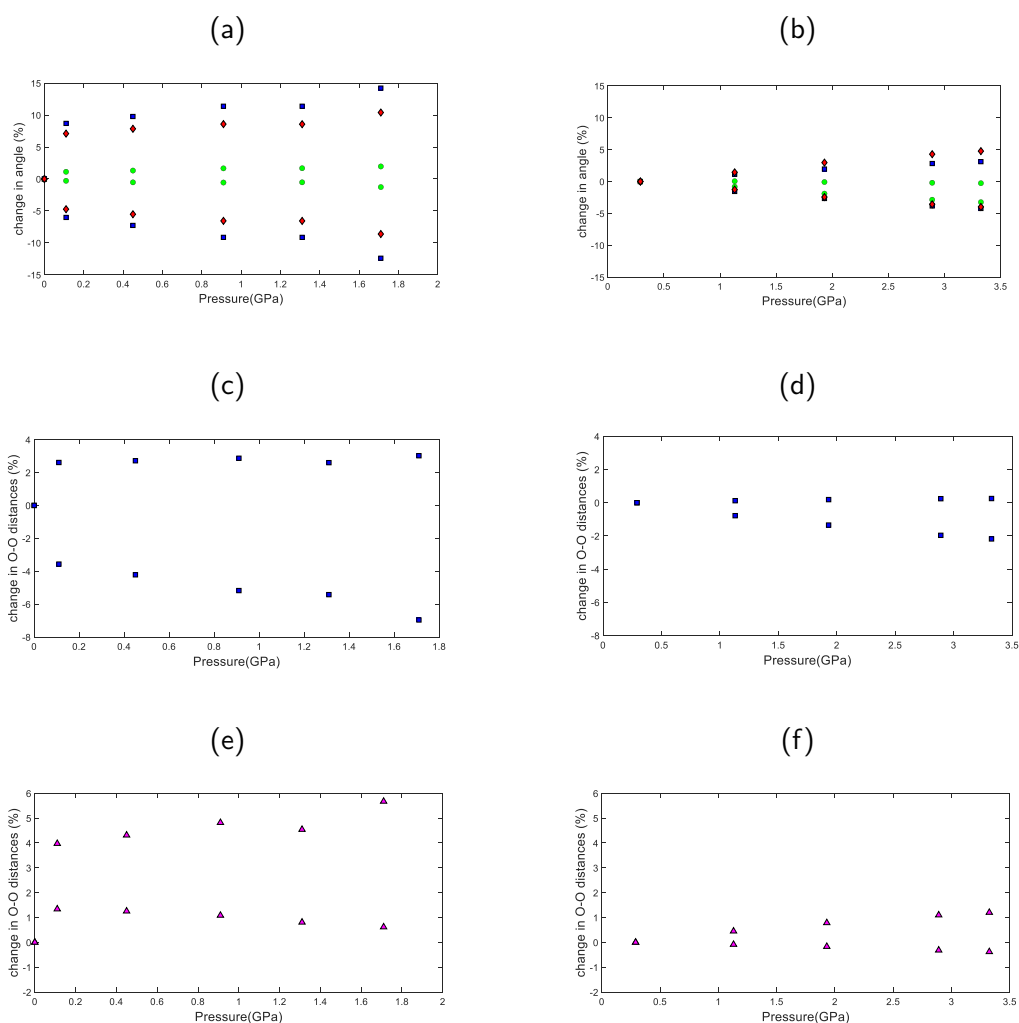

Figure 4: Structural evolution of T-O-T bond angles and O-O channel distances with pressure. (a) and (b) show cooperative increase and decrease in bond angles for empty and filled K-LTL, respectively. 12-ring angles in *a*-plane are shown in blue squares (T1-O1-T1 decrease and T1-O2-T2 increase), *d<sub>6r</sub>* angles in *a*-plane are shown in green circles (T2-O3-T2 increase and T2-O5-T2 decrease) and angles in *c*-plane are shown in red diamonds (T2-O6-T2 increase and T2-O4-T1 decrease). (c-f) show changes in the largest and shortest O-O distances with pressure for 12-ring channel in non-penetrating PTM, 12-ring channel in penetrating media, 8-ring channel in non-penetrating media and 8-ring channel in penetrating media, respectively.

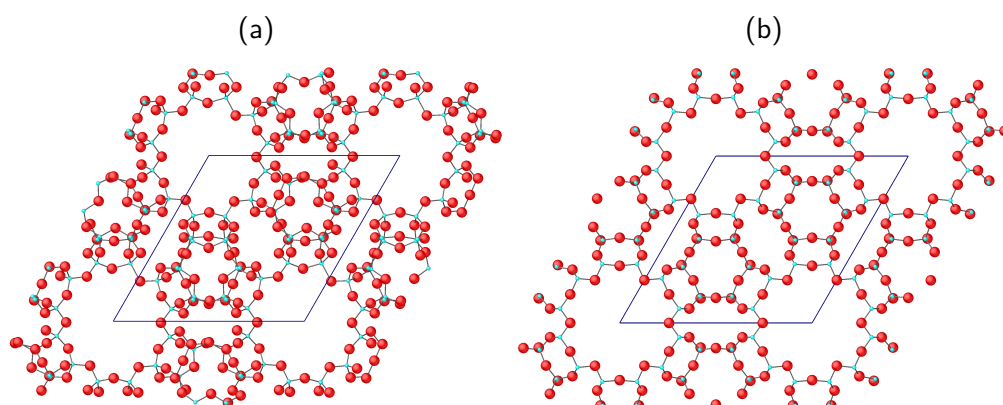

Figure 5: GASP-simulated structures of the empty K-LTL framework outside the flexibility window at 4.15(4) GPa, using T-O bond lengths of (a) 1.642 Å, leading to steric clashes of oxygen atoms and (b) bond lengths of 1.60 Å, where geometric relaxation can be achieved.

## GASP Input files

Example flexibility window-search script using GASP's "search" function. This was used to find the grey window limits for the hexagonal LTL unit cell, as shown in Figure 6 of the MS.

```

ELEMENT
si 0.26
o 1.35
k 1.33
/ELEMENT
POLY
tet si o 1.642
/POLY
OPTION
relax
smallmove 1e-6
smallmis 1e-3
search hex
/OPTION
INPUT
structure LTL_P1.cif
bonding LTL_P1.bonding

```

```
/INPUT
OUTPUT
window LTL-window-1
/OUTPUT
```

Example of a single-point GASP input file used to relax the structure at a specific point. This was used to find relaxed, high-pressure structures within the flexibility window, plotted in Figure 6 of the MS. The "new cell" parameters are specified using those extracted from LeBail fitting of data at each pressure point.

```
ELEMENT
si 0.26
o 1.35
k 1.33
/ELEMENT
POLY
tet si o 1.642
/POLY
OPTION
relax
smallmove 1e-6
smallmis 1e-3
/OPTION
INPUT
structure LTL_P1.cif
bonding LTL_P1.bonding
new cell 18.39 18.39 7.48 90 90 120
/INPUT
OUTPUT
structure LTL_0.19GPa.cif
/OUTPUT
```
